# Supplementary material
Source: PubMed Central journal article supplement (PMC6645809)
Supplement: ao8b00135_si_001.pdf [file ao8b00135_si_001.pdf]

# **Probing Multiple Binding Modes of DNA Hybridization: A Comparison between Single-molecule Observations and Ensemble Measurements**

Kenjiro Yazawa<sup>1</sup> and Hiroyuki Furusawa\*<sup>1,2</sup>

<sup>1</sup>Graduate School of Science and Engineering and <sup>2</sup>Innovative Flex Course for Frontier Organic Material Systems (iFront), Yamagata University, 4-3-16 Jonan, Yonezawa, Yamagata 992-8510, Japan

## **Supporting Information**

### **Table of Contents**

- Figure S-1: CCD-camera images for DNA hybridization of Cy3-labeled DNAs.
- Figure S-2: Histogram analyses of association time for 8 mer-8 mer DNA.
- Figure S-3: Histogram analyses of association time for 12 mer-12 mer DNA.
- Figure S-4: Histogram analyses of association time for dA<sub>12</sub>-dT<sub>12</sub> DNA.
- Figure S-5: Typical time courses of frequency of a QCM plate and kinetic analysis of the DNA hybridization.
- Figure S-6: TIRFM observation for the d(ATG)<sub>4</sub>-d(CAT)<sub>4</sub> hybridization.
- Figure S-7: Histogram analyses of association time for d(ATG)<sub>4</sub>-d(CAT)<sub>4</sub> DNA.

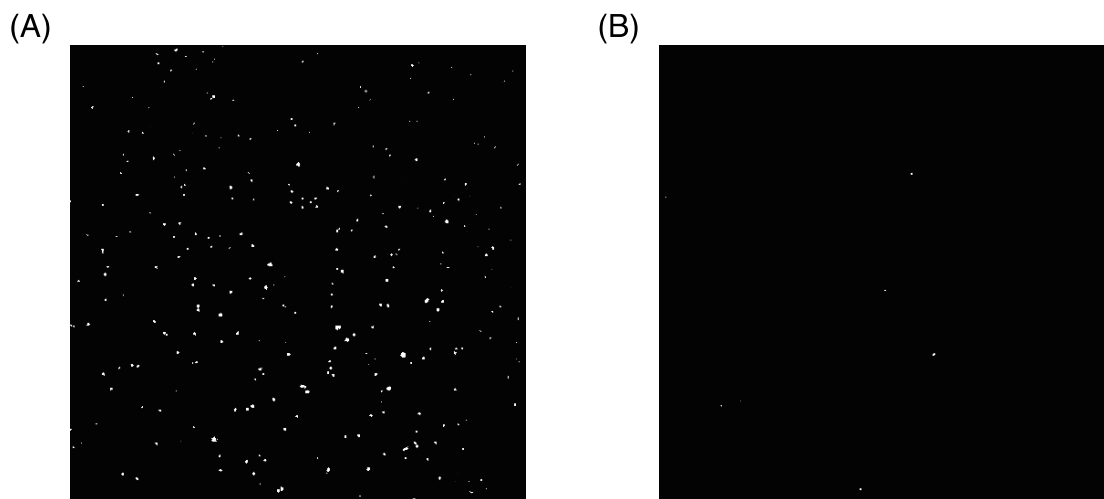

**Figure S-1.** CCD-camera images for DNA hybridization of Cy3-labeled DNAs (8 mer) with (A) the prove-DNA (8 mer) and (B) no prove-DNA on the glass plate of the reaction cell in single-molecule observation by TIRFM. Experimental conditions: 200 mM NaCl TE buffer (10 mM Tris-HCl, pH 8.0, 1 mM EDTA, 200 mM NaCl) [Cy3-DNA] = 1 nM at 20 °C.

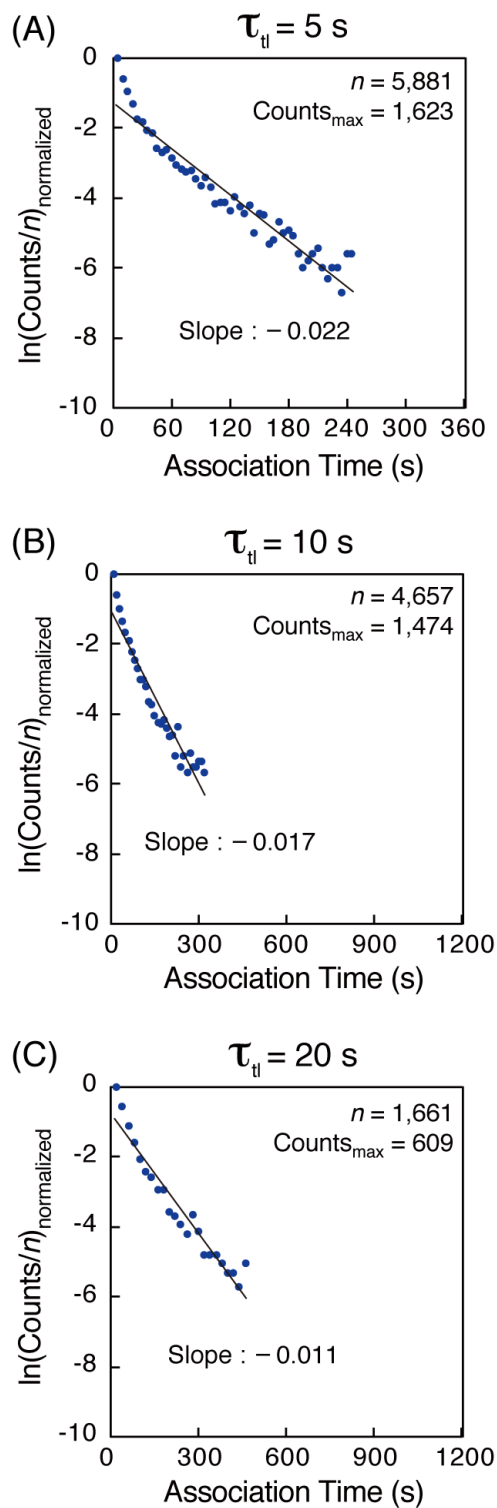

**Figure S-2.** Histogram analyses of association time for single-molecule hybridization of 8 mer-8 mer DNA based on time-lapse images obtained at an interval of (A) 5 s, (B) 10 s, and (C) 20 s. Each vertical axis was normalized with the maximum value of  $(\text{Counts}/n)$  of 1. Slope values were obtained according to eq. 6. Experimental conditions: 200 mM NaCl TE buffer (10 mM Tris-HCl, pH 8.0, 1 mM EDTA, 200 mM NaCl) [Cy3-DNA] = 1 nM at 20 °C.

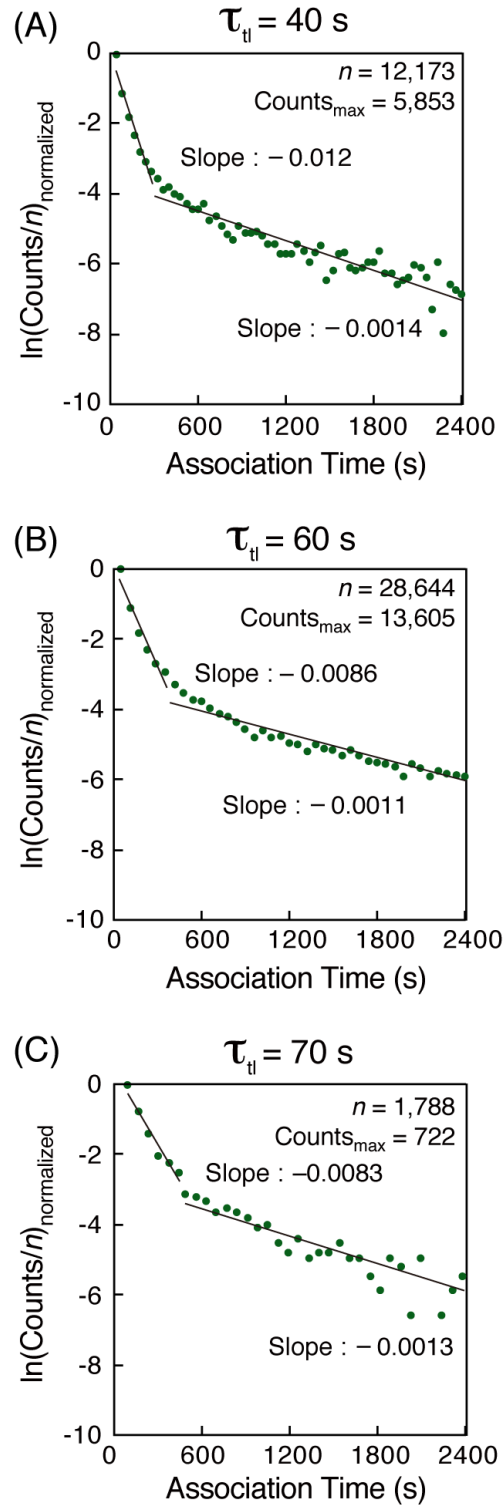

**Figure S-3.** Histogram analyses of association time for single-molecule hybridization of 12 mer-12 mer DNA based on time-lapse images obtained at an interval of (A) 40 s, (B) 60 s, and (C) 70 s. Each vertical axis was normalized with the maximum value of  $(Counts/n)$  of 1. Slope values were obtained according to eq. 6. Experimental conditions: 200 mM NaCl TE buffer (10 mM Tris-HCl, pH 8.0, 1 mM EDTA, 200 mM NaCl) [Cy3-DNA] = 1 nM at 20 °C.

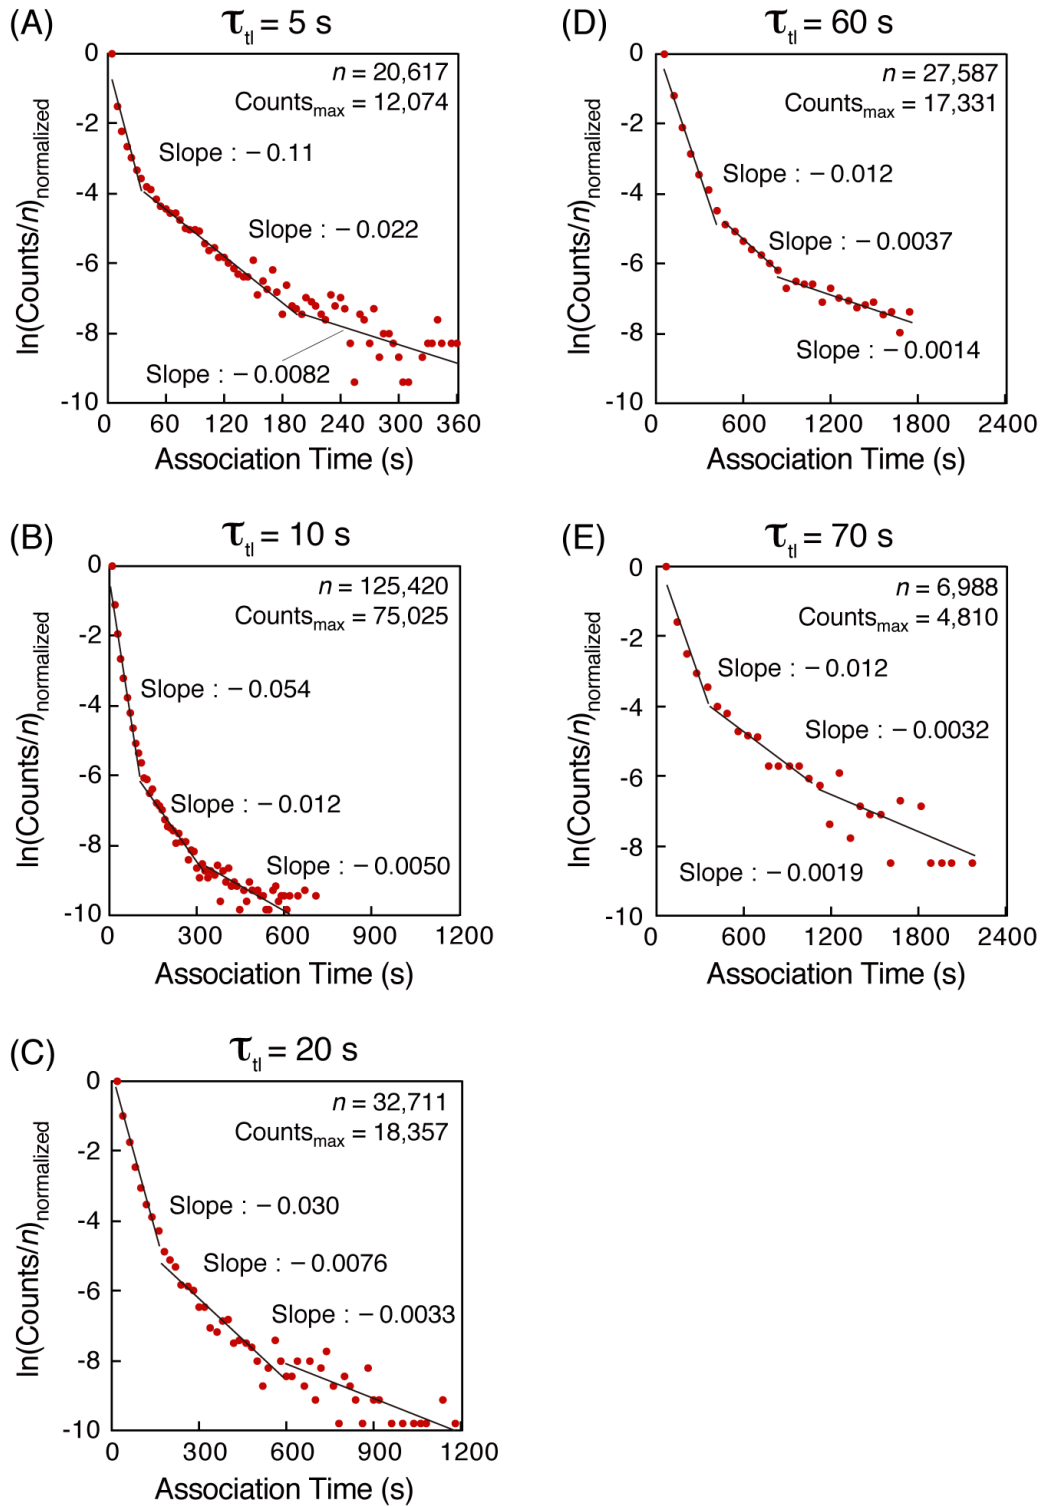

**Figure S-4.** Histogram analyses of association time for single-molecule hybridization of dA<sub>12</sub>-dT<sub>12</sub> DNA based on time-lapse images obtained at an interval of (A) 5 s, (B) 10 s, (C) 20 s, (D) 60 s, and (E) 70 s. Each vertical axis was normalized with the maximum value of (Counts/n) of 1. Slope values were obtained according to eq. 6. Experimental conditions: 200 mM NaCl TE buffer (10 mM Tris-HCl, pH 8.0, 1 mM EDTA, 200 mM NaCl) [Cy3-DNA] = 1 nM at 20 °C.

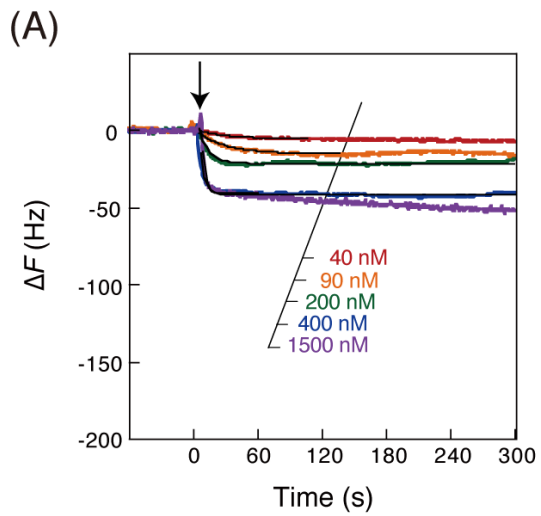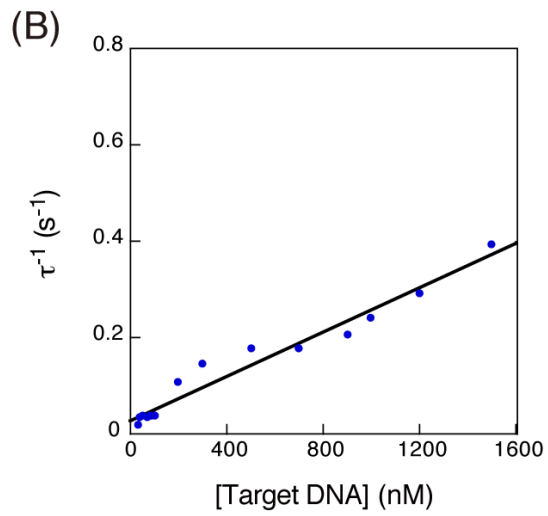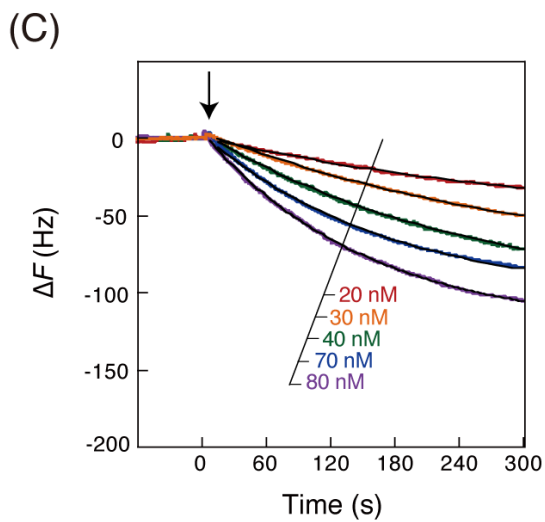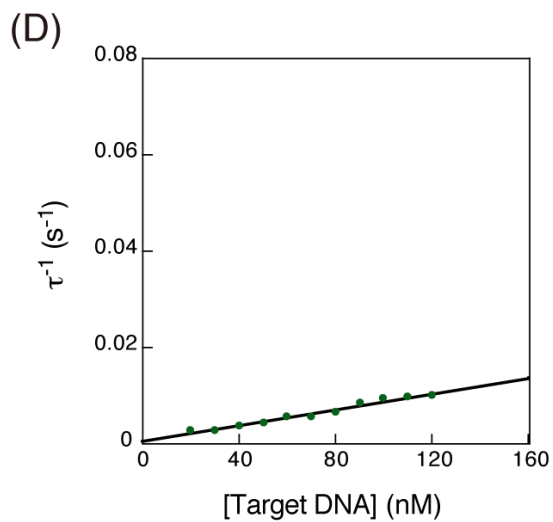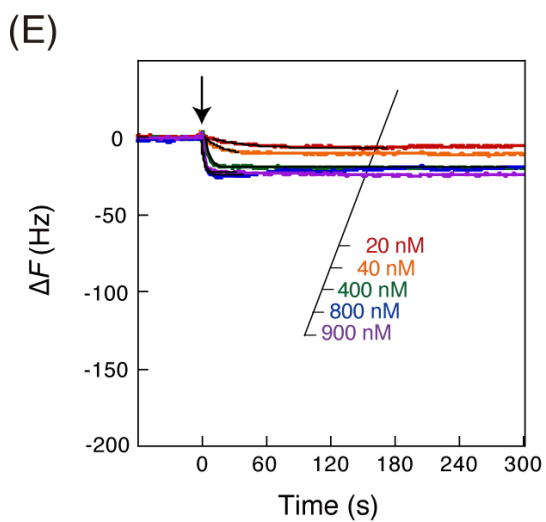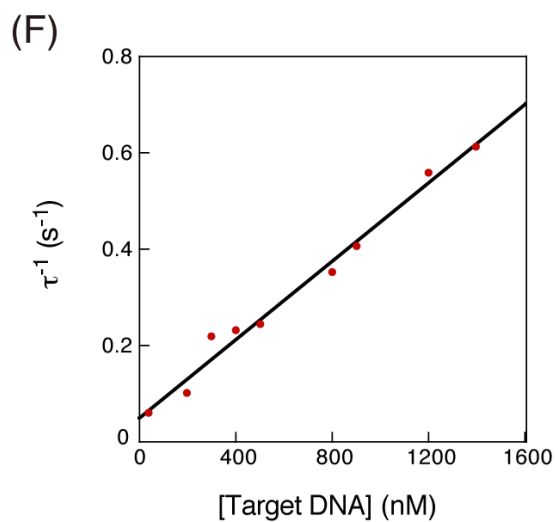

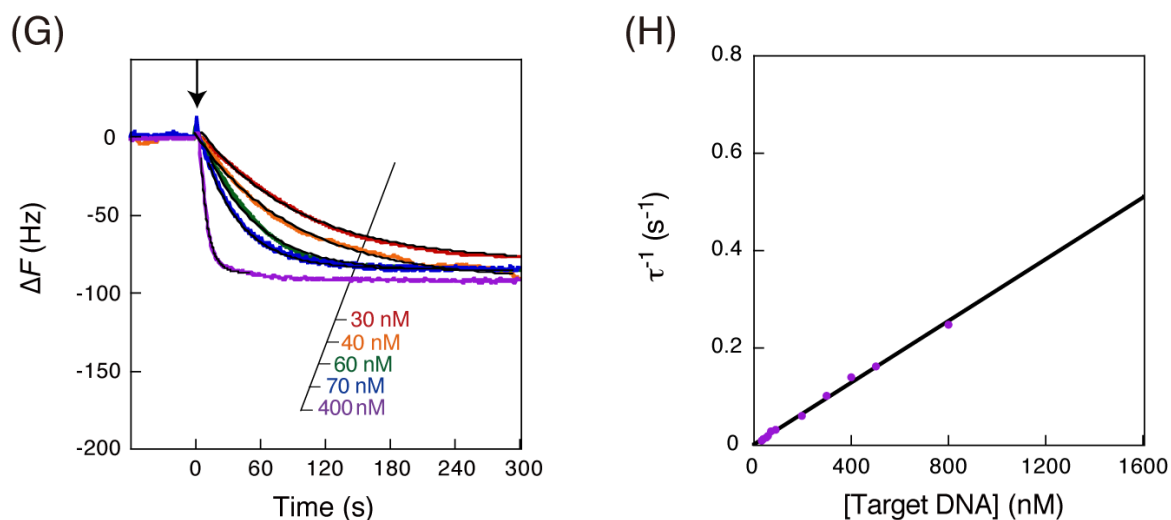

**Figure S-5.** Typical time courses of frequency of a QCM plate and kinetic analysis according to eq. 11 for observation of DNA hybridizations of (A, B) 8 mer-8 mer, (C, D) 12 mer-12 mer, (E, F)  $dA_{12}$ - $dT_{12}$ , and (G, H)  $d(ATG)_4$ - $d(CAT)_4$ . The fitting curves according to eqs. 9 and 10 were overwriting on each plot with a solid black line (A, C, E, and G). Experimental condition: 200 mM NaCl TE buffer (10 mM Tris-HCl, pH 8.0, 1 mM EDTA, 200 mM NaCl) at 20 °C.





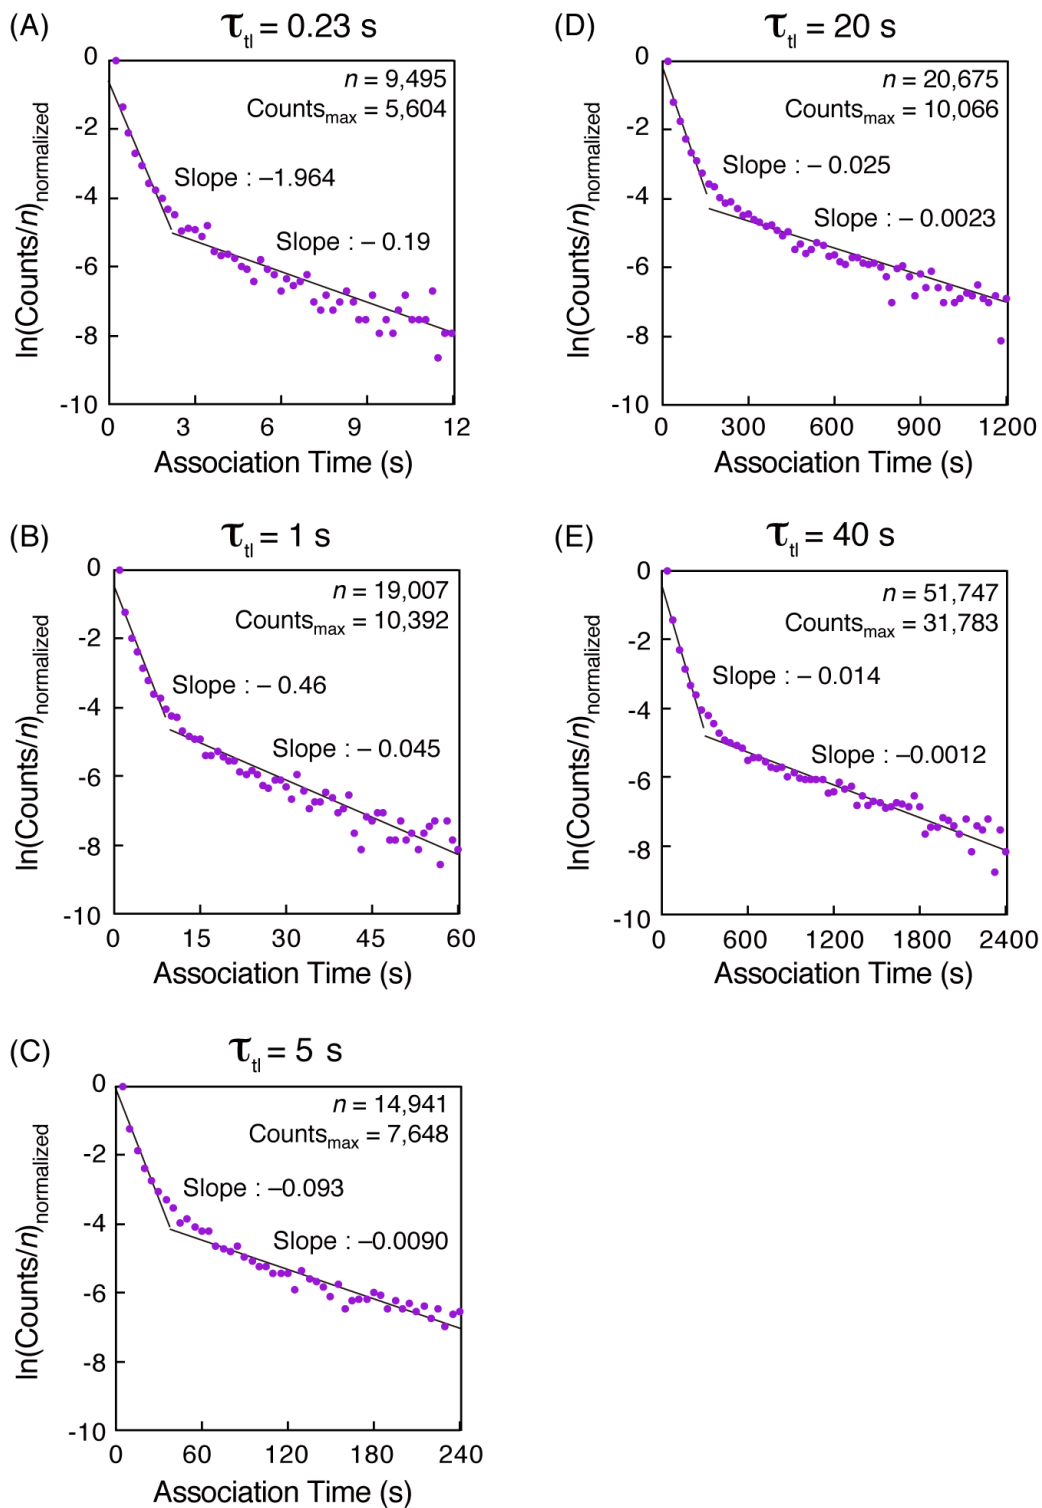

**Figure S-7.** Histogram analyses of association time for single-molecule hybridization of  $d(\text{ATG})_4$ - $d(\text{CAT})_4$  DNA based on time-lapse images obtained at an interval of (A) 0.23 s, (B) 1 s, (C) 5 s, (D) 20 s, and (E) 40 s. Each vertical axis was normalized with the maximum value of  $(\text{Counts}/n)$  of 1. Slope values were obtained according to eq. 6. Experimental conditions: 200 mM NaCl TE buffer (10 mM Tris-HCl, pH 8.0, 1 mM EDTA, 200 mM NaCl)  $[\text{Cy3-DNA}] = 1$  nM at 20 °C.
